# Supplementary material
Source: PubMed Central journal article supplement (PMC2851983)
Supplement: 0914764107_pnas.200914764SI.pdf [file 0914764107_pnas.200914764SI.pdf]

# Supporting Information

Kim et al. 10.1073/pnas.0914764107

## SI Results

**Identification of SPR Ligands from *A. aegypti*.** To search for SPR ligands from *A. aegypti*, we prepared whole-body extracts of *Aedes* (10 g) with acidified methanol, and subsequently subjected them to chromatographic fractionation using an analytical C4-reversed-phase HPLC (Fig. S4A). HPLC fractions were tested for the presence of SPR agonist activity using the  $\text{Ca}^{2+}$  assay with the *Aedes* SPR. Fifty HPLC fractions were analyzed and at least eight of these fractions showed significant agonist activity (Fig. S4B). As a negative control, the same fractions were tested with cells lacking SPR. This control tests for any SPR-independent activation, as might be caused for example by ATP acting on the endogenous P2-purinoreceptor of CHO cells (1). None of the tested fractions generated SPR-independent  $\text{Ca}^{2+}$  activation.

We wondered whether any of the fractions containing SPR agonists might contain members of the MIP family. As a first attempt to address this, we further purified the most active fractions by RP-HPLC using phenyl analytical and C18 narrow bore columns and analyzed fractions by MALDI-TOF mass spectrometry. No masses corresponding to known MIPs were identified, possibly due to the low abundance of these peptides in whole body extracts. To test whether the active fractions might nonetheless contain MIPs, we synthesized *Aedes* MIP peptides and analyzed them using the same HPLC protocol (Fig. S4A). *Aedes* MIPs 2 and 5, 1, and 4 had retention times corresponding to active fractions 17, 18, and 26, respectively (Fig. S4A and B), suggesting that the activity in those HPLC fractions might be due to these peptides. In contrast, active fractions 21, 41, 45, 46, and 50 do not correspond to the elution positions of MIPs, raising the possibility of the third class of ligand for SPR, distinct from both

SPs and MIPs. However, it is also equally possible that these SPR agonist activities come from partially processed peptides from the precursor and/or breakdown products of mature MIPs, because their molecular nature is not presently known.

The most potent fraction (#26), which corresponds to the elution position of MIP4, was subjected to further fractionation by RP-HPLC. After separation using an analytical phenyl column, biological activity eluted in a single fraction, which was then fractionated further using a narrow bore  $\text{C}_{18}$  column (Fig. S4C). Agonist activity eluted in fraction 41, which did not correspond to the elution position of MIP4 (Fig. S4C), nor any of the other known *Aedes* MIPs. This indicates that the most potent activity in *Aedes* whole body extracts may not be due to any of the known MIPs but possibly to another ligand.

## SI Materials and Methods

### Isolation of SPR Agonist Activities from *Aedes* Whole Body Extracts.

Acidic methanol extracts of whole body *A. aegypti* were fractionated by RP-HPLC using a Jupiter  $\text{C}_4$  10- $\mu\text{m}$  300- $\text{\AA}$  analytical column (250 mm  $\times$  4.6 mm i.d.; Phenomenex) with a linear gradient of 5–60% acetonitrile/0.1% TFA, over 55 min at a flow rate of 1 mL/min. Fractions (1 mL) were collected, and lyophilized for bioassay or mass analysis. Biological active fractions were further fractionated by RP-HPLC using a Brownlee aquapore phenyl 7- $\mu\text{m}$  300- $\text{\AA}$  analytical column (220  $\times$  4.6 mm i.d.; Applied Biosystems), using the same condition as above, followed by separation on a Jupiter  $\text{C}_{18}$  10- $\mu\text{m}$  300- $\text{\AA}$  narrow bore column (250 mm  $\times$  2.1 mm i.d.; Phenomenex) at a flow rate of 0.2 mL/min. Elution positions of synthetic MIPs were determined using similar columns and conditions.

1. Iredale PA, Hill SJ (1993) Increases in intracellular calcium via activation of an endogenous P2-purinoreceptor in cultured CHO-K1 cells. *Br J Pharmacol* 110:1305–1310.

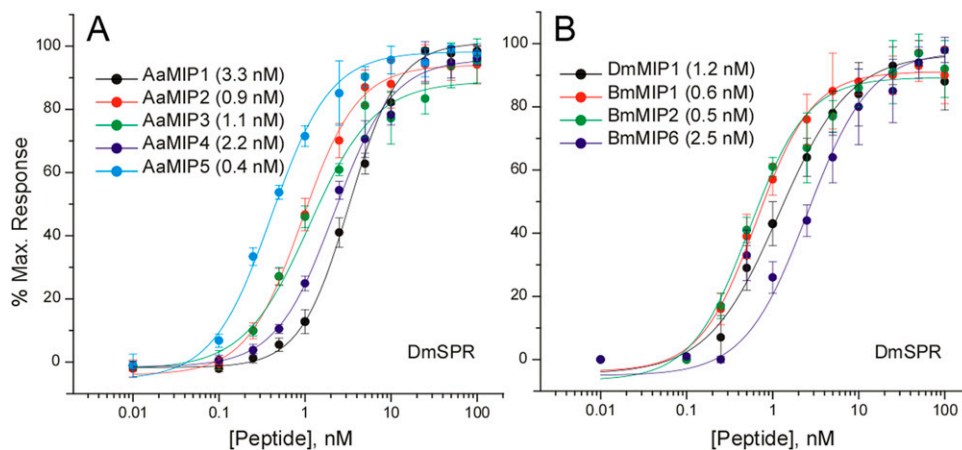

**Fig. S1.** Agonist activities of (A) *Aedes* and (B) *Bombyx* MIPs on *Drosophila* SPR. Dose-response curves were generated by treating varying concentrations of MIPs on CHO cells expressing *Drosophila* SPR, aequorin, and a chimeric G protein,  $\text{G}\alpha_{\text{qi}}$ . Numbers in parentheses indicate  $\text{EC}_{50}$  values. Each data point is mean  $\pm$  SEM ( $n = 4$ ).





**Table S2. Amino acid sequence of SP, Dup99B, and MIPs**

| SP and MIPs (PTSPs) | Amino acid Sequence                                                                                                                                              |
|---------------------|------------------------------------------------------------------------------------------------------------------------------------------------------------------|
| DmSP                | WEWPWNRK <u>P</u> TK <u>F</u> <u>P</u> I <u>P</u> S <u>P</u> N <u>P</u> RD <u>K</u> W <u>C</u> R <u>L</u> N <u>L</u> G <u>P</u> A <u>W</u> G <u>G</u> R <u>C</u> |
| DmDUP99B            | *QDRNDTEWI <u>Q</u> S <u>Q</u> K <u>D</u> R <u>E</u> K <u>W</u> <u>C</u> R <u>L</u> N <u>L</u> G <u>P</u> Y <u>L</u> G <u>G</u> R <u>C</u>                       |
| DmMIP1              | AWQSLQSSW-a                                                                                                                                                      |
| DmMIP2              | AWKSMNVAW-a                                                                                                                                                      |
| DmMIP3              | EAQGWNKFRGAW-a                                                                                                                                                   |
| DmMIP4              | EPTWNNLKGMW-a                                                                                                                                                    |
| DmMIP5              | DQWQKLHGGW-a                                                                                                                                                     |
| AaMIP1              | TWKNLQGGW-a                                                                                                                                                      |
| AaMIP2              | AWNKLINGGW-a                                                                                                                                                     |
| AaMIP3              | VNAGPAQWNKFRGSW-a                                                                                                                                                |
| AaMIP4              | EPGWNNLKGLW-a                                                                                                                                                    |
| AaMIP5              | SEKWNKLSSSW-a                                                                                                                                                    |
| AgMIP1              | SWSKMNAAW-a                                                                                                                                                      |
| AgMIP2              | LSGGNRNSGWTKFGAAW-a                                                                                                                                              |
| AgMIP3              | EPGWNNLKGLW-a                                                                                                                                                    |
| AgMIP4              | ADKWDKLASAW-a                                                                                                                                                    |
| BmPTSP1             | WQDLNSAW-a                                                                                                                                                       |
| BmPTSP2             | GWQDLNSAW-a                                                                                                                                                      |
| BmPTSP3             | APEKWAAFHGSW-a                                                                                                                                                   |
| BmPTSP4             | GWNDISSVW-a                                                                                                                                                      |
| BmPTSP5             | AWQDMSSAW-a                                                                                                                                                      |
| BmPTSP6             | AWSALHGTW-a                                                                                                                                                      |
| BmPTSP7             | SWQDLNSVW-a                                                                                                                                                      |
| BmPTSP8             | WSSLHSGWA                                                                                                                                                        |
| AcMIP1              | WKQMSVW-a                                                                                                                                                        |

\*Q, underlined P and underlined Cs indicate pyroglutamic acid, hydroxyproline, and disulfide bonds between Cs respectively. Note all insect MIPs share a highly conserved sequence, W(X)<sub>6</sub>W-amide. Sequences of MIP (or PTSP) peptides are predicted from cDNA sequences (*D. melanogaster*, GenBank access no. CAC17604; *A. aegypti*, EAT35715; *Anopheles gambiae*, EAA12136.3; *B. mori* BAB70681; *A. californica* EB246635.1).
